# Supplementary material for: PURA syndrome-causing mutations impair PUR-domain integrity and affect P-body association
Source: eLife journal article supplement (doi:10.7554/elife.93561), 2024-01-24

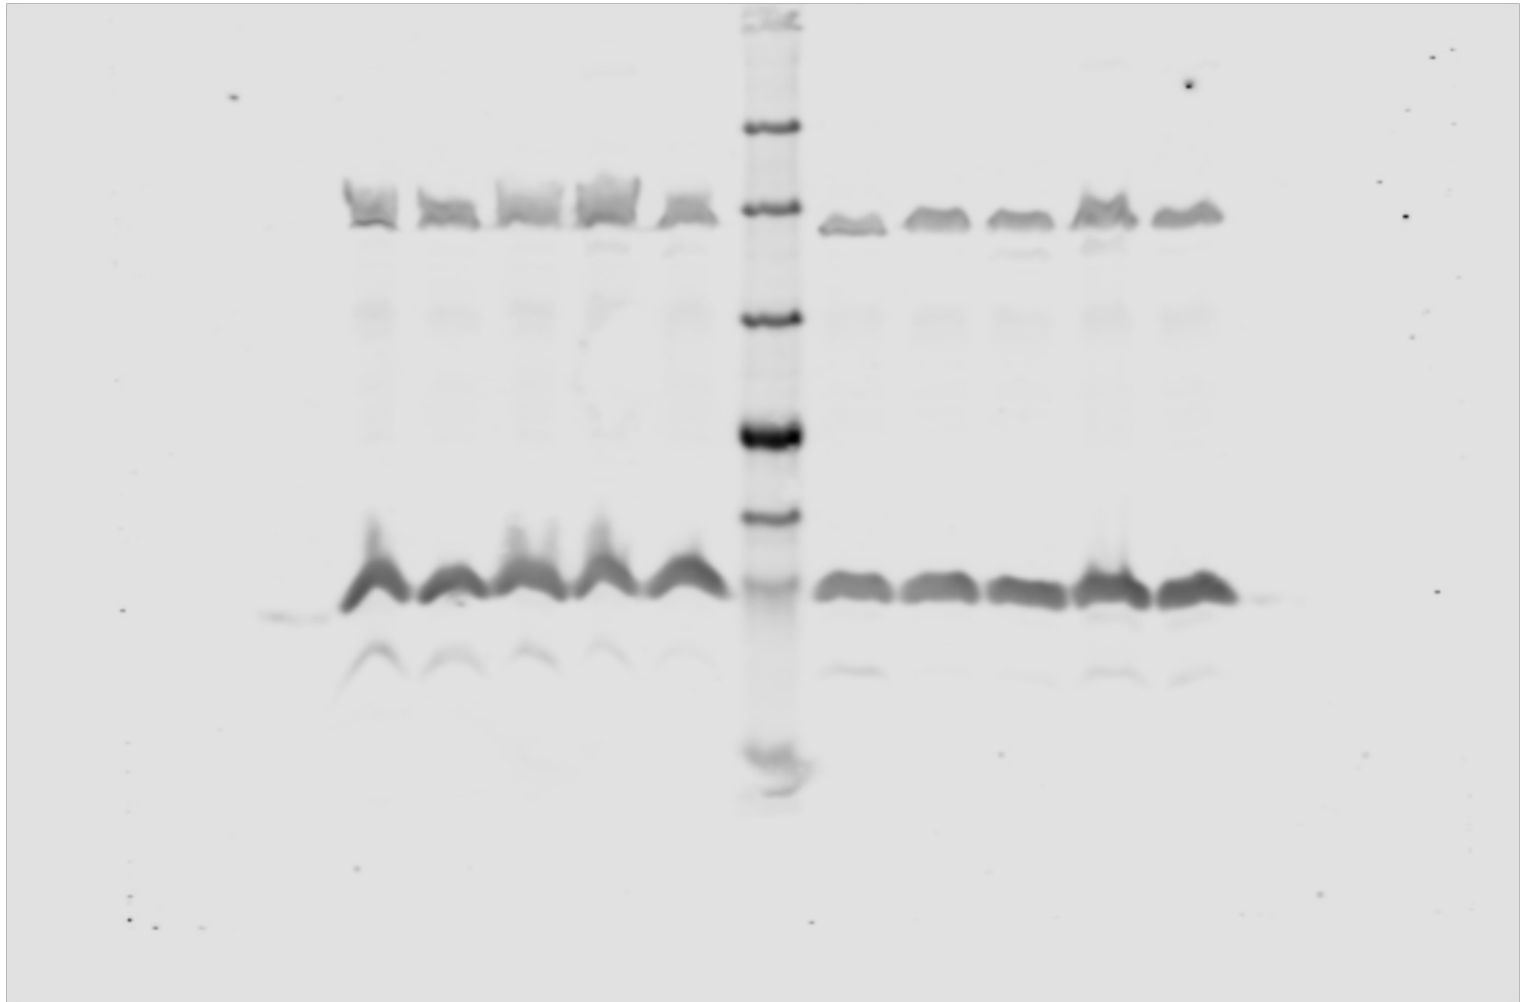

Supplement: fig1-figsupp1-data1 [file elife-93561-fig1-figsupp1-data1-v1.pdf]
