# Supplementary material for: PURA syndrome-causing mutations impair PUR-domain integrity and affect P-body association
Source: eLife journal article supplement (doi:10.7554/elife.93561), 2024-01-24

# EMSA *hsPURA III*

Scan date & time: 2021.07.30 11:35:55  
Export date & time: 2021.07.30 12:13:08  
Instrument S/N: 86350374  
Software version: 2.0.0.6  
Pixel size: 100 micrometer  
Scan speed: slow

File name: III\_run3  
[Cy5], PMT: Multi-alkali 953V

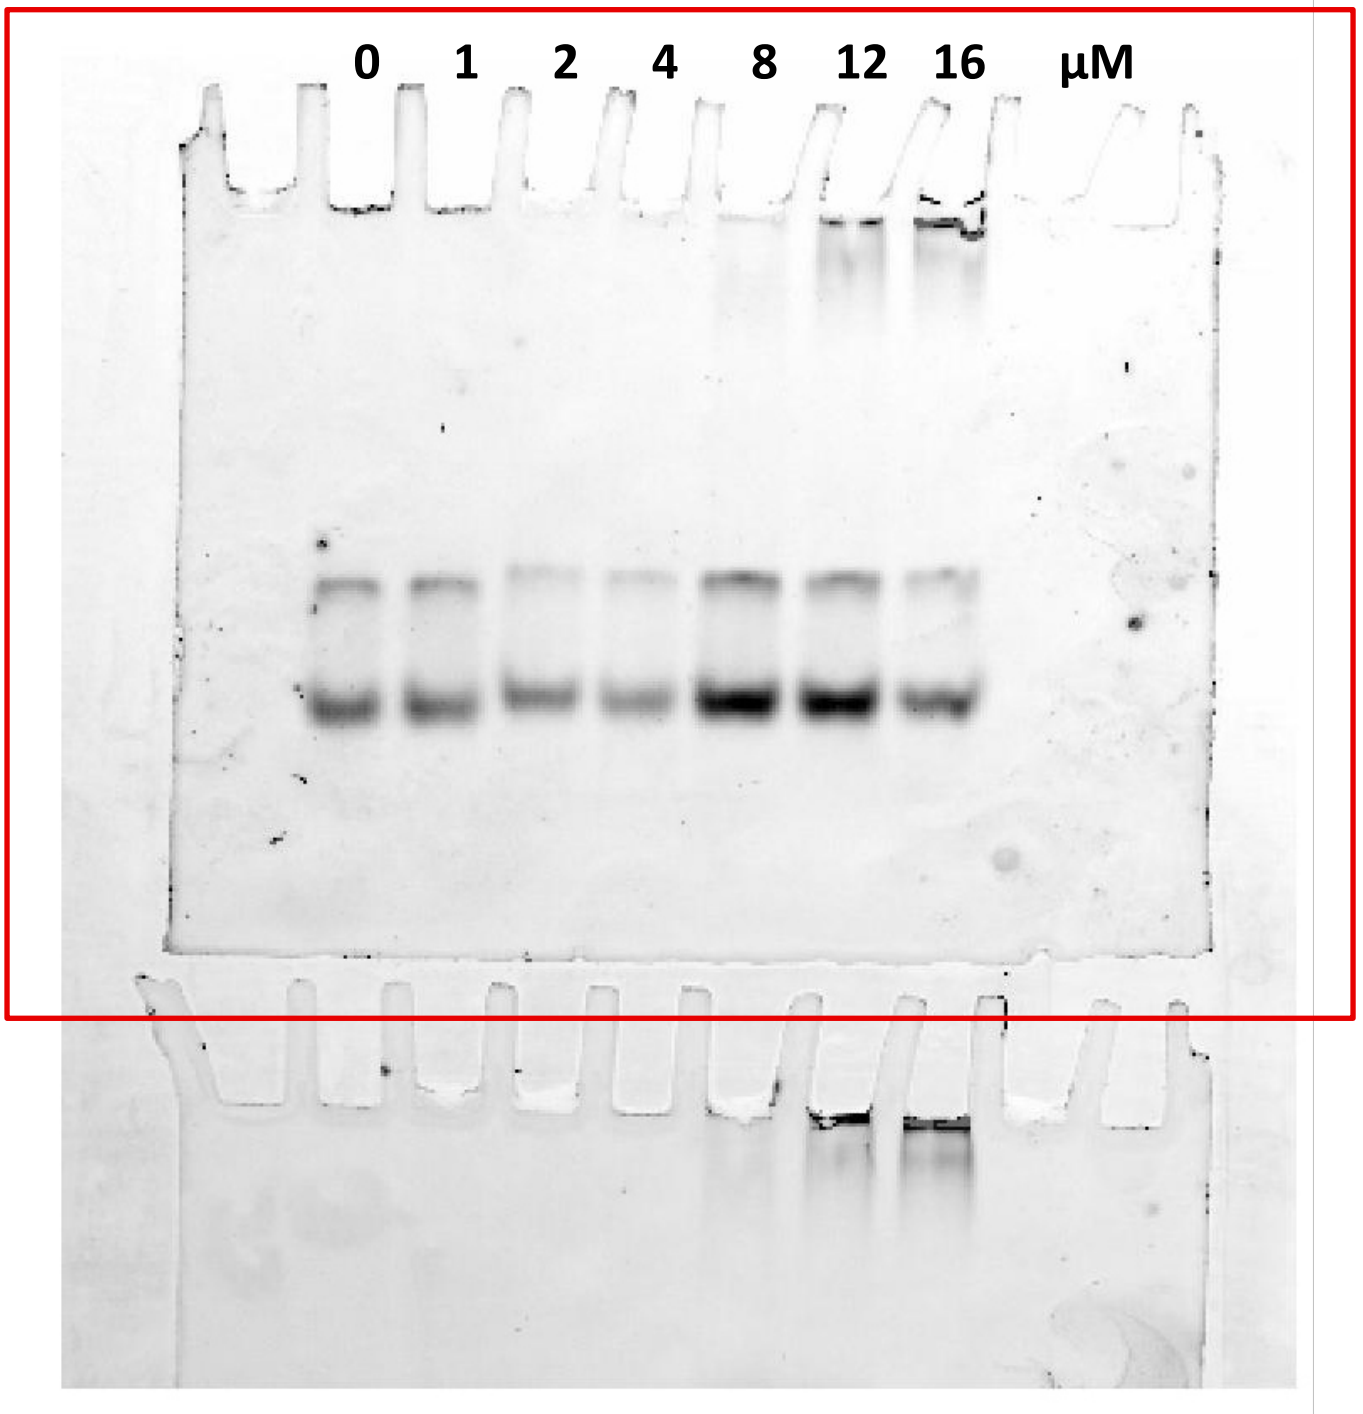

Supplement: fig3-data2 [file elife-93561-fig3-data2-v1.zip]
