# Supplementary material for: PURA syndrome-causing mutations impair PUR-domain integrity and affect P-body association
Source: eLife journal article supplement (doi:10.7554/elife.93561), 2024-01-24

# EMSA *hsPURA* I-II R140P

Scan date & time: 2021.07.05 15:35:23

Export date & time: 2021.07.05 16:29:42

Instrument S/N: 86350374

Software version: 2.0.0.6

Pixel size: 100 micrometer

Scan speed: slow

File name: R140P\_run1

[Cy5], PMT: Multi-alkali 794V

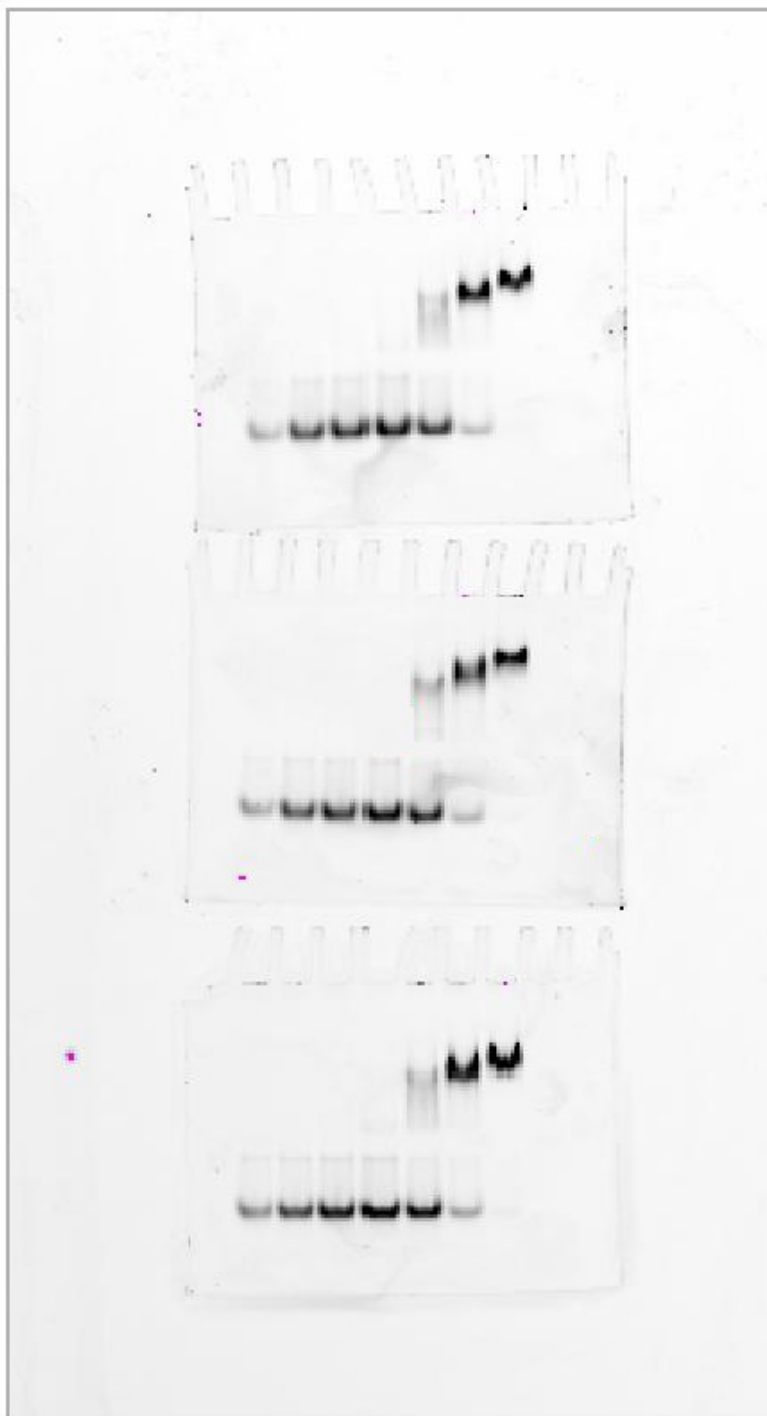

Supplement: fig4-data3 [file elife-93561-fig4-data3-v1.zip]
