# Supplementary material for: PURA syndrome-causing mutations impair PUR-domain integrity and affect P-body association
Source: eLife journal article supplement (doi:10.7554/elife.93561), 2024-01-24

# EMSA *hsPURA* I-II K97E

Scan date & time: 2020.11.27 13:26:13

Export date & time: 2020.11.27 13:57:48

Instrument S/N: 86350374

Software version: 2.0.0.6

Pixel size: 100 micrometer

Scan speed: slow

File name: 20201127-132613

[Cy5], PMT: Multi-alkali 748V

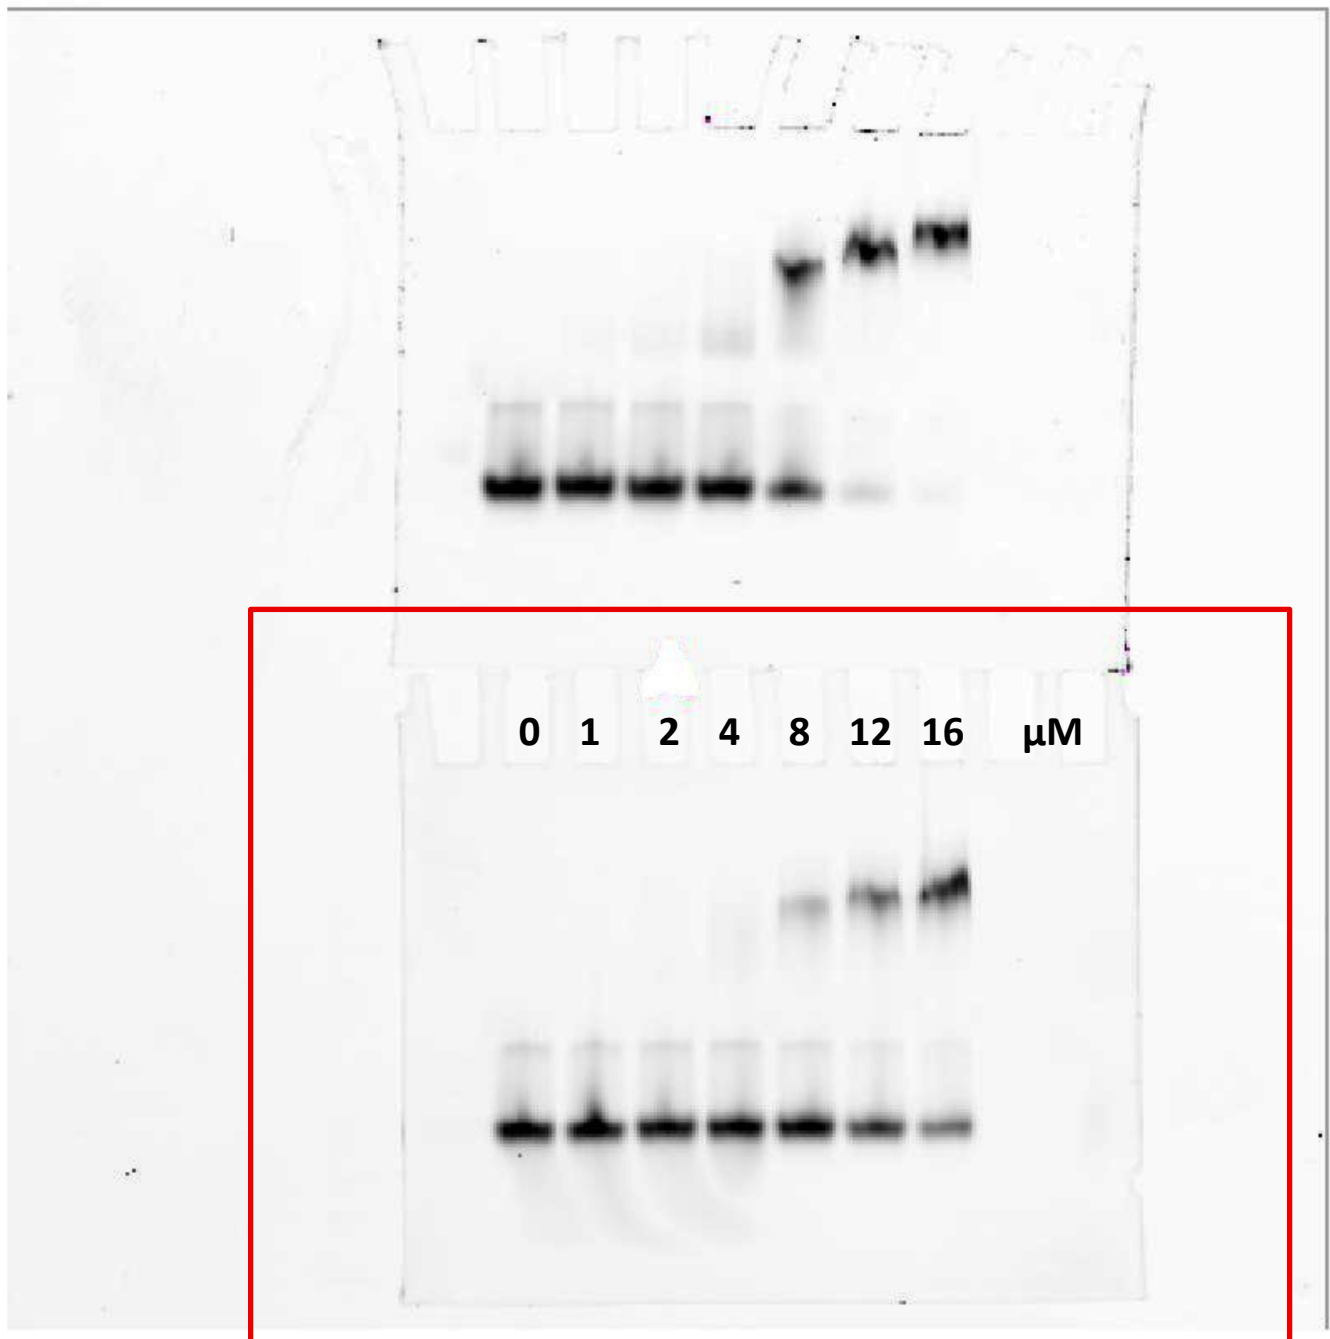

Supplement: fig4-data6 [file elife-93561-fig4-data6-v1.zip]
