# Supplementary material for: PURA syndrome-causing mutations impair PUR-domain integrity and affect P-body association
Source: eLife journal article supplement (doi:10.7554/elife.93561), 2024-01-24

# EMSA *hsPURA* I-II m11

Scan date & time: 2021.07.30 15:35:39  
Export date & time: 2021.07.30 16:14:47  
Instrument S/N: 86350374  
Software version: 2.0.0.6  
Pixel size: 100 micrometer  
Scan speed: slow

File name: m11\_run1  
[Cy5], PMT: Multi-alkali 924V

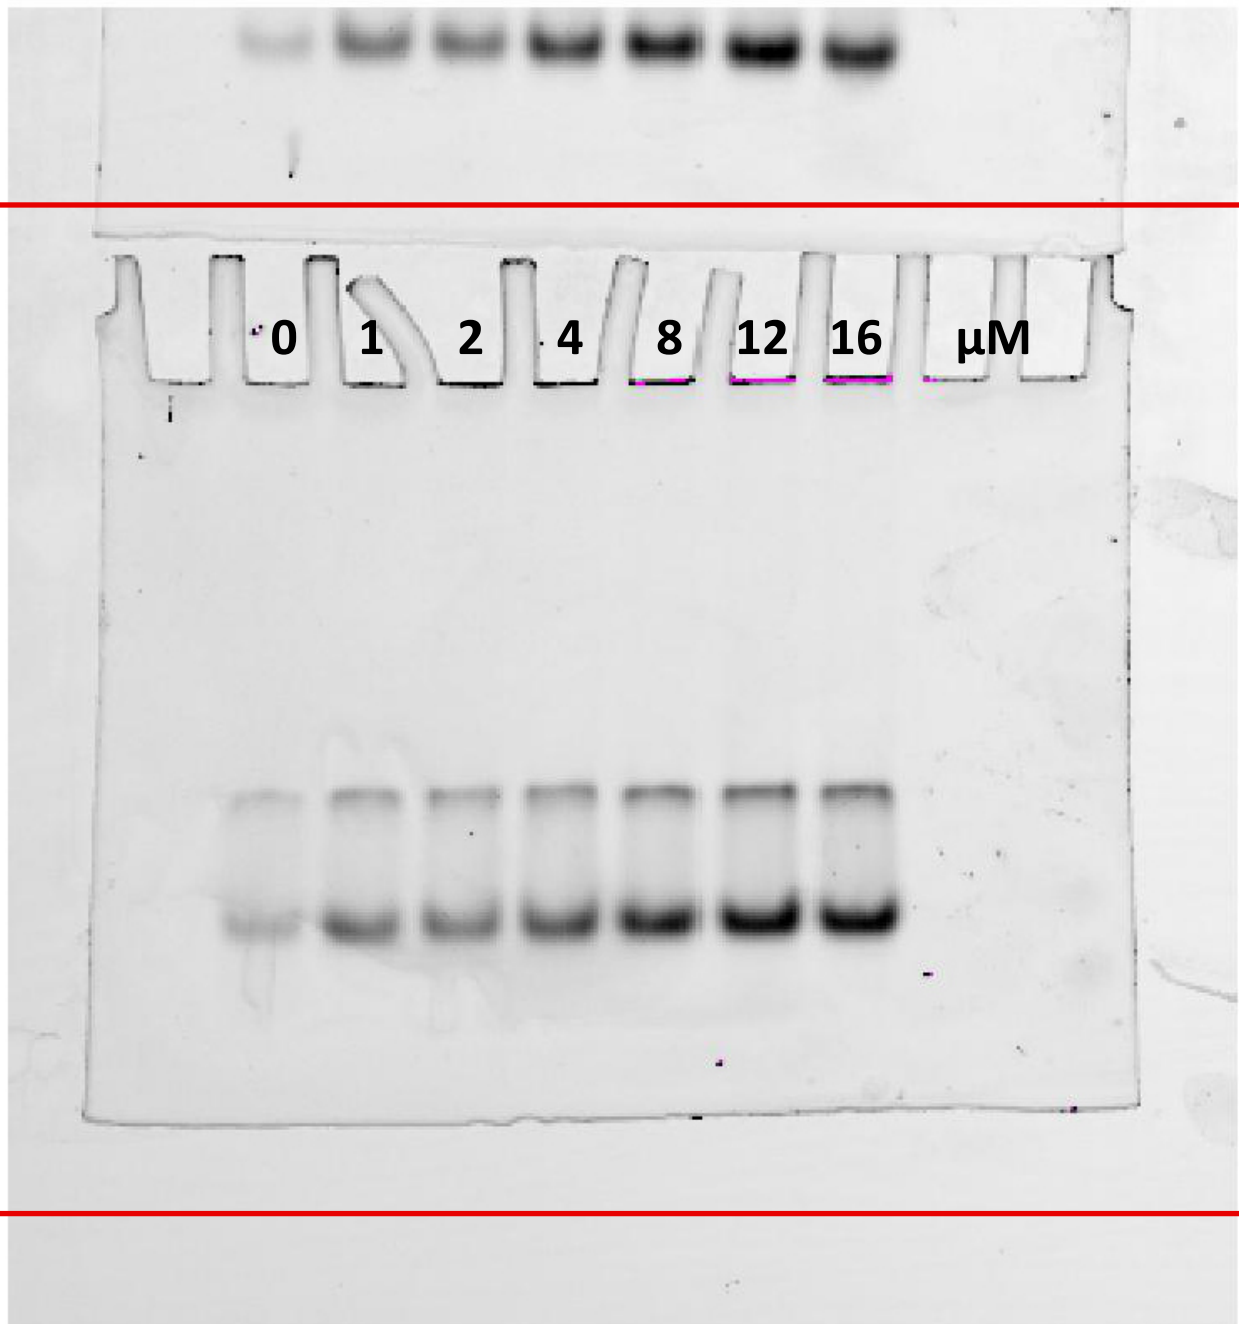

Supplement: fig4-data8 [file elife-93561-fig4-data8-v1.zip]
