# Supplementary figures and images for: PURA syndrome-causing mutations impair PUR-domain integrity and affect P-body association
Source: eLife journal article supplement (doi:10.7554/elife.93561), 2024-01-24

*anti-PURA*

**CTRL KD**

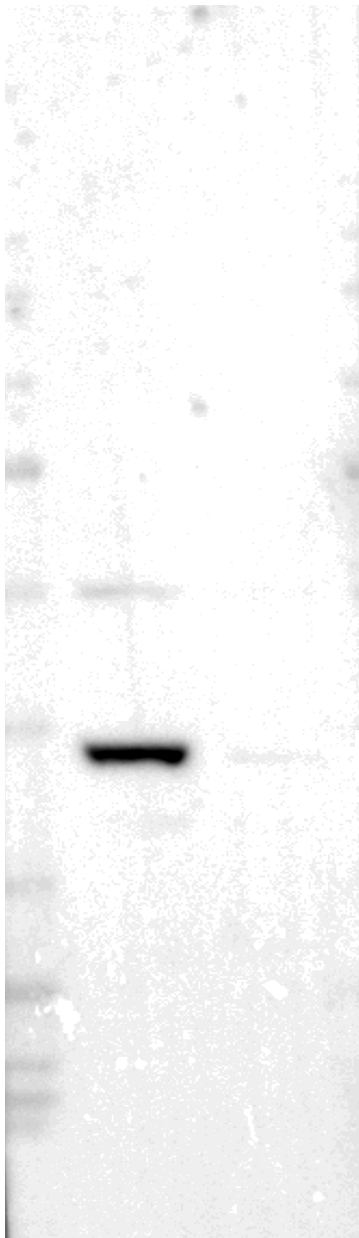

▷ **PURA**  
~35 kDa

*Repeat 1*

*anti-H3*

**CTRL KD**

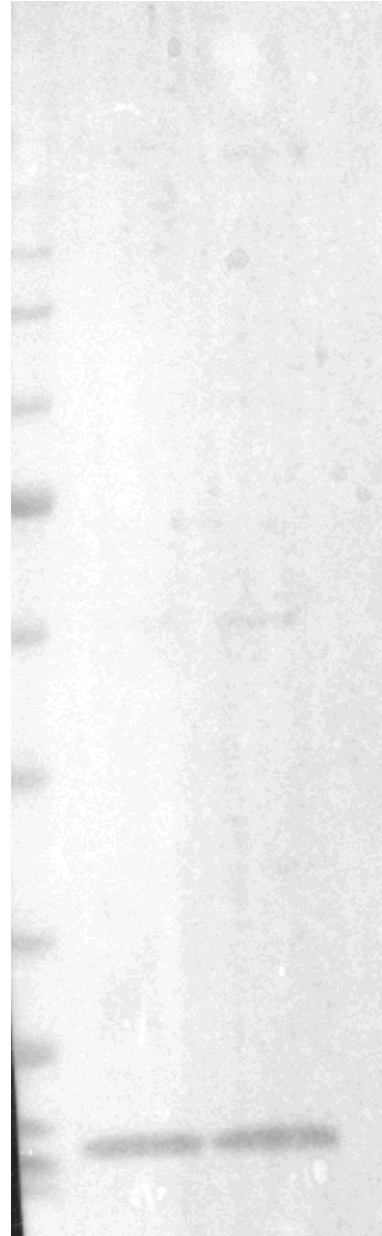

▷ **H3**  
~18 kDa

*Repeat 1*

Supplement: fig1-figsupp3-data1 [file elife-93561-fig1-figsupp3-data1-v1.zip]

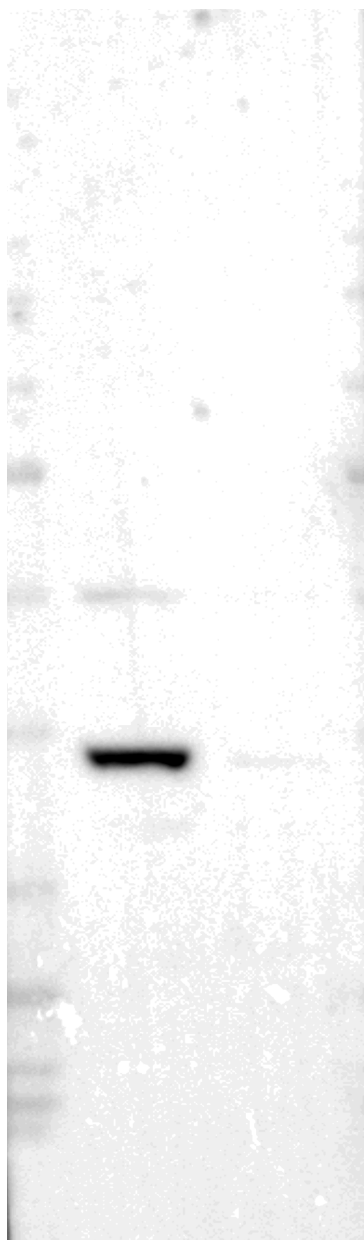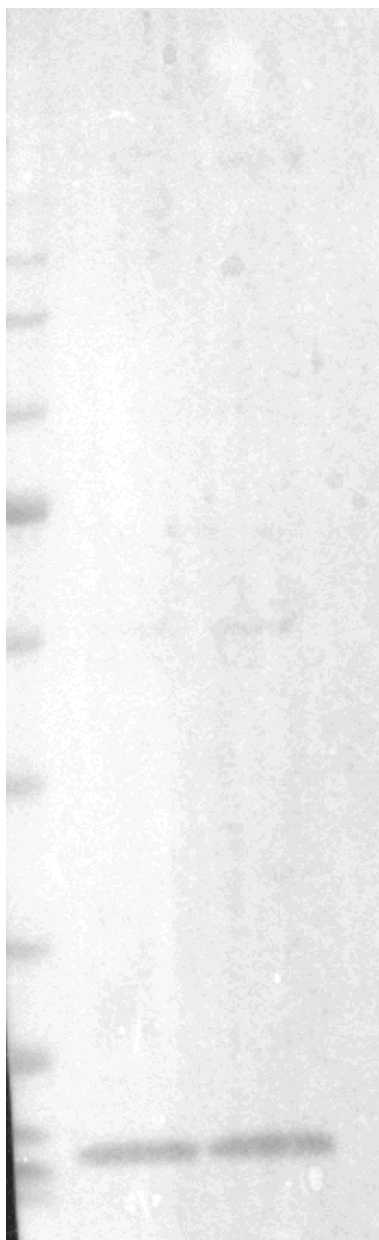

Supplement: fig1-figsupp3-data1 [file elife-93561-fig1-figsupp3-data1-v1.zip]

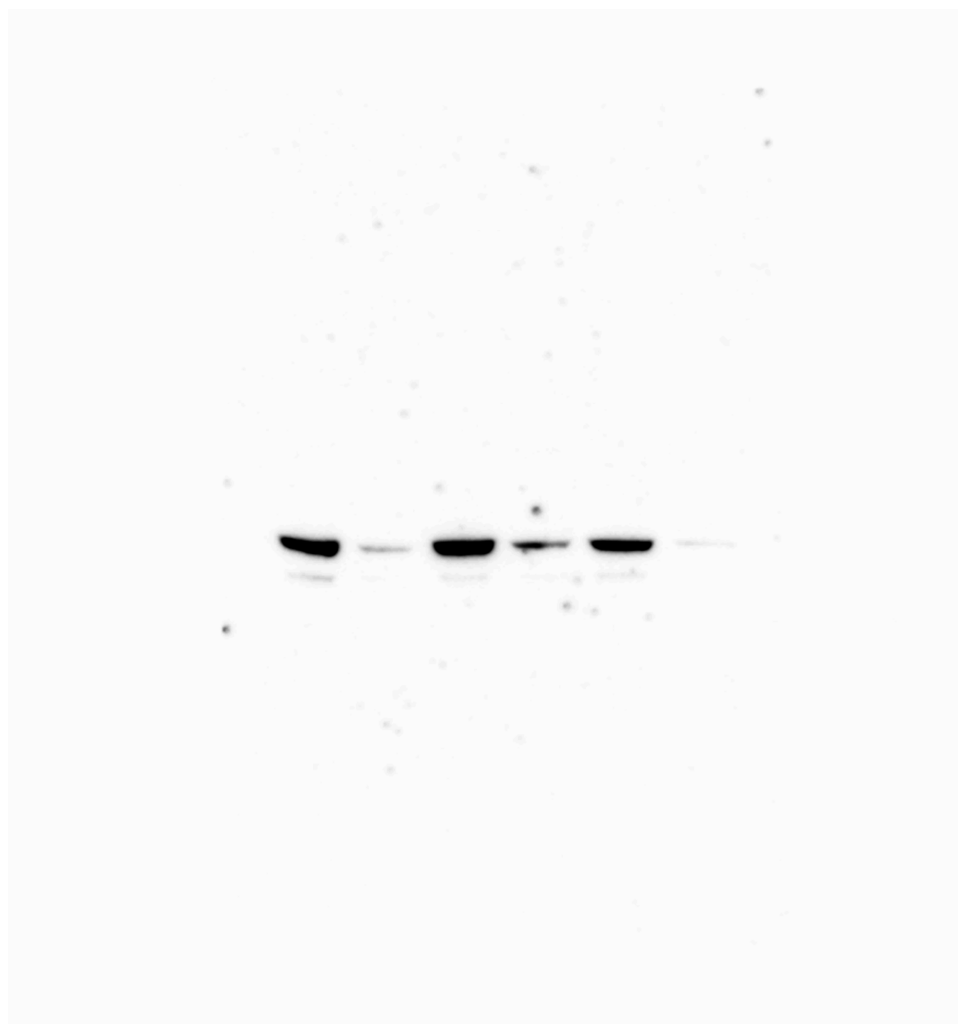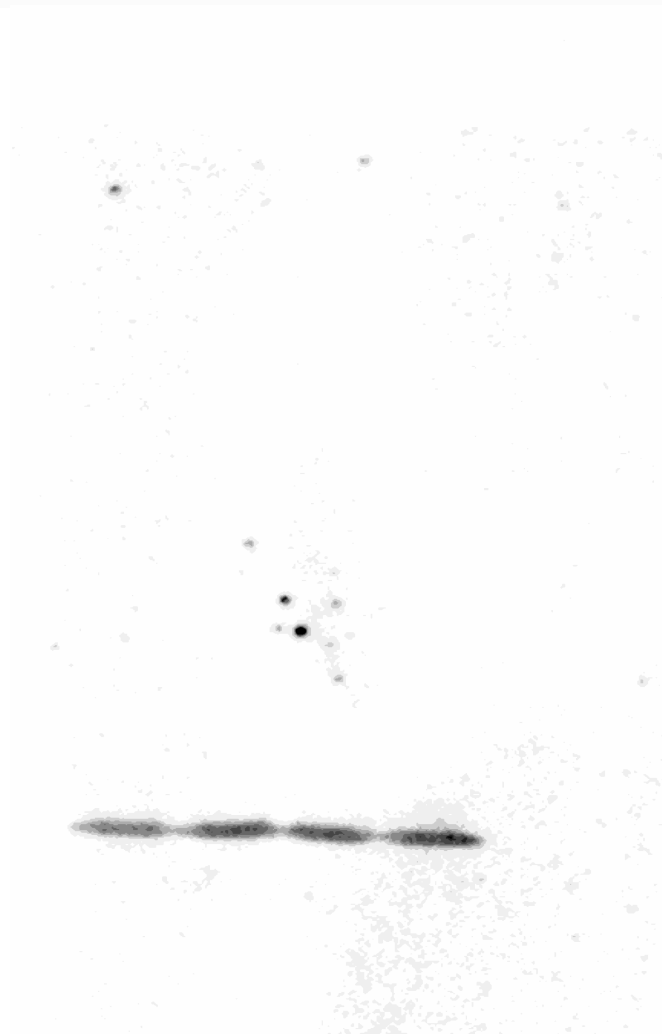

Supplement: fig1-figsupp3-data2 [file Figure_1-Figure_Supplement_3C-source_data_1.pdf › Figure_1-Figure_Supplement_3C-source_data_1.pdf]

*anti-PURA*

CTRL KD CTRL KD

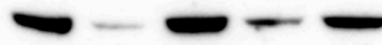

▷ **PURA**  
~35 kDa

*Repeat 2&3*

*anti-H3*

CTRL KD CTRL KD

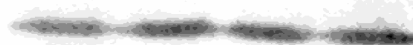

▷ **H3**  
~18 kDa

*Repeat 2&3*

Supplement: fig1-figsupp3-data2 [file Figure_1-Figure_Supplement_3C-source_data_2.pdf › Figure_1-Figure_Supplement_3C-source_data_2.pdf]
